# Supplementary material for: Lipid nanoparticle-mediated lymph node–targeting delivery of mRNA cancer vaccine elicits robust CD8+ T cell response
Source: PubMed Central journal article supplement — Proc Natl Acad Sci U S A. 2022 Aug 15;119(34):e2207841119. doi: 10.1073/pnas.2207841119 (PMC9407666; doi:10.1073/pnas.2207841119), 2022-08-15
Supplement: pnas.2207841119.sapp.pdf [file pnas.2207841119.sapp.pdf]

## Supporting Information for

### Lipid nanoparticle-mediated lymph node-targeting delivery of cancer mRNA vaccine elicits robust CD8<sup>+</sup> T cell response

Jinjin Chen<sup>1,2†</sup>, Zhongfeng Ye<sup>1†</sup>, Changfeng Huang<sup>1</sup>, Min Qiu<sup>1</sup>, Donghui Song<sup>1</sup>, Yamin Li<sup>1</sup>,  
Qiaobing Xu<sup>1\*</sup>

Qiaobing Xu  
Email: [Qiaobing.Xu@tufts.edu](mailto:Qiaobing.Xu@tufts.edu)

#### This PDF file includes:

Supporting text  
Figures S1 to S6  
Tables S1 to S2  
SI References

## Materials

All the chemicals for lipid synthesis were purchased from Sigma-Aldrich or Fisher Scientific. 96 well high binding plates for ELISA assay were purchased from Fisher Scientific (Pittsburgh, PA, USA). HRP-conjugated total IgG, IgG1, and IgG2c goat anti-mouse antibody were bought from Abcam (Boston, MA, USA). pMRNA plasmid for TRP2<sub>180-188</sub> mRNA construction was purchased from System Biosciences (CA, USA). B16F10 murine melanoma cells were purchased from ATCC (Manassas, VA, USA) and cultured in Dulbecco's modified eagle's medium (DMEM, Sigma-Aldrich) with 10% fetal bovine serum (FBS, Sigma-Aldrich) and 1% penicillin-streptomycin (Gibco). H-2K<sup>b</sup> (OVA<sub>257-264</sub>)-SIINFEKL-PE tetramer was purchased from MBL International Corporation (Woburn, MA, USA). The labels and catalogs of antibodies are listed in Table S1. Luciferase and Cre mRNA were purchased from Trilink BioTechnologies (San Diego, CA, USA)

## Chemical synthesis

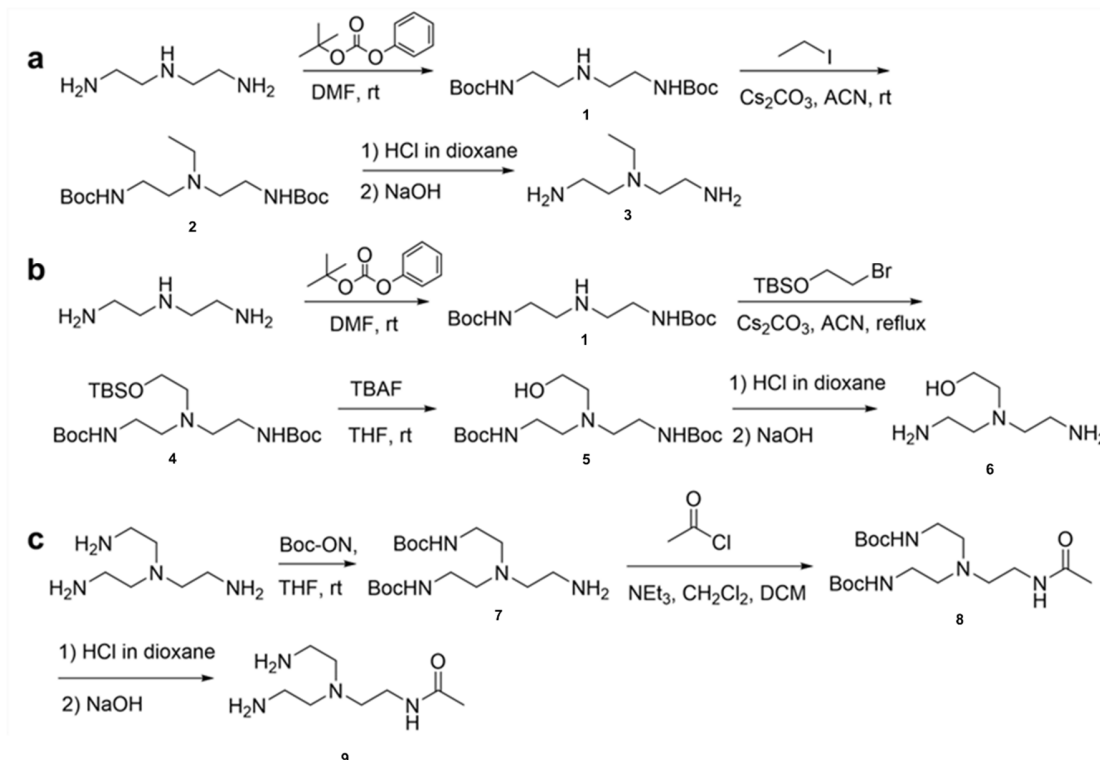

**Fig. S1.** The synthesis route of 113 analog head 3, 6 and 9

**Synthesis of Amine 3.** 1 was synthesized according to the known procedure.<sup>1</sup> A solution of 1 (1.21 g, 4 mmol) in 20 ml of acetonitrile, cesium carbonate (3.91 g, 12 mmol) and ethyl iodide (0.39 ml, 4.8 mmol) was added successively under nitrogen atmosphere. The reaction mixture was stirred overnight at room temperature (r.t.). The reaction mixture was then concentrated under reduced pressure. Water (20 ml) and ethyl acetate (20 ml) was then added to the residue. The aqueous

layer was extracted twice with ethyl acetate (2\*20 ml). The combined organic layers were washed with brine, dried over anhydrous sodium sulfate, filtered, and concentrated with rotary evaporation. The residue was purified by silica gel column chromatography (Dichloromethane/Methanol = 95/5 to 90/10) to yield 1.06 g of 2 (yield 80%). ESI-MS m/z: [M+H]<sup>+</sup> calcd. 332.25; found 332.30.

A solution of 2 (995mg, 3 mmol) in 10 ml of ethyl acetate, was added dropwise 4N HCl in dioxane (4.5 ml, 18 mmol) at 0 ° C under nitrogen atmosphere. The reaction mixture was stirred at r.t.. Then the reaction mixture was concentrated under reduced pressure. The residue was triturated with diethyl ether three times and a small amount of ethyl acetate. The resultant solids were dissolved in 10N NaOH and extracted with dichloromethane (6\* 20 ml). The combined organic layers were dried over anhydrous sodium sulfate, filtered, and concentrated to 280 mg of 3 (yield 71%). ESI-MS m/z: [M+H]<sup>+</sup> calcd. 132.14; found 132.26.

**Synthesis of amine 6.** 4 was prepared in a similar way as 2. A solution of 1 (1.21 g, 4 mmol) in 20 ml of acetonitrile, cesium carbonate (3.91 g, 12 mmol) and (2-bromoethoxy) (*tert*-butyl) Dimethyl silane (1.44 g, 6 mmol) was added successively under nitrogen atmosphere. The reaction mixture was stirred under reflux for one day. After the reaction was complete (monitored by TLC), the reaction mixture was cooled and concentrated under reduced pressure. Water (20 ml) and ethyl acetate (20 ml) was then added to the residue. The aqueous layer was extracted with ethyl acetate twice (2\*20ml). The combined organic layers were washed with brine, dried over anhydrous sodium sulfate, filtered, and concentrated with rotary evaporation. The residue was purified by silica gel column chromatography (Dichloromethane/Methanol = 95/5 to 90/10) to yield 1.30 g of 2 (yield 70%). ESI-MS m/z: [M+H]<sup>+</sup> calcd. 462.33; found 462.35.

8 ml of TBAF solution (8 mmol, 1 M in THF) was added dropwise into a solution of 4 (1.15 g, 2.5 mmol) in 10 ml of dry THF at 0 ° C under nitrogen atmosphere. The reaction mixture was stirred at r.t. for 3-5 hours before it was quenched with 10 ml of PBS buffer (pH 7.0, 10X) when no more starting materials were present. The mixture was extracted with ethyl acetate (3\*10 ml). The combined organic layers were washed with brine, dried over anhydrous sodium sulfate, filtered, and concentrated *in vacuo*. The residue was purified by silica gel column chromatography (Dichloromethane/Methanol = 95/5 to 90/10) to yield 0.70 g of 5 (yield 80%). ESI-MS m/z: [M+H]<sup>+</sup> calcd. 348.24; found 348.30.

4N HCl in dioxane (2.6 ml, 10.4 mmol) was added dropwise into a solution of 5 (600mg, 1.73mmol) in 6 ml of ethyl acetate at 0 ° C under nitrogen atmosphere. The reaction mixture was stirred at r.t. until no more starting materials existed. Then the reaction mixture was concentrated under reduced pressure. The residue was triturated with diethyl ether three times and a small amount of ethyl acetate. The resultant solids were dissolved in 10N NaOH and extracted with dichloromethane (6\* 20 ml). The combined organic layers were dried over anhydrous sodium

sulfate, filtered, and concentrated to yield 130 mg of 6 (yield 50%). ESI-MS m/z:  $[M+H]^+$  calcd. 148.14; found 148.22.

**Synthesis of amine 9.** 7 was synthesized according to established procedures.<sup>2</sup> Triethylamine (1.2 ml, 8 mmol) was added to a solution of 7 (1.39 g, 4 mmol) in 10 ml of dry dichloromethane, followed by the dropwise addition of acetyl chloride (0.43 ml, 6 mmol) at 0 °C under nitrogen atmosphere. The reaction mixture was stirred at r.t. overnight before it was quenched with 10 ml of saturated  $\text{NaHCO}_3$  and diluted with dichloromethane. The organic layer was washed successively with  $\text{NH}_4\text{Cl}$ , brine, water, and dried over anhydrous sodium sulfate, filtered, and concentrated *in vacuo*. The residue was purified by silica gel column chromatography (Dichloromethane/Methanol = 95/5 to 90/10) to yield 1.24 g of 8 (yield 80%). ESI-MS m/z:  $[M+H]^+$  calcd. 389.27; found 389.45.

4N HCl in dioxane (3.8 ml, 15.2 mmol) was added dropwise into a solution of 8 (970mg, 2.5 mmol) in 10 ml of ethyl acetate at 0 °C under nitrogen atmosphere. The reaction mixture was stirred at r.t. until no starting materials were detectable. Then the reaction mixture was concentrated under reduced pressure. The residue was triturated with diethyl ether three times and a small amount of ethyl acetate. The resultant solids were dissolved in 3N NaOH and extracted with dichloromethane (6\* 20 ml). The combined organic layers were dried over anhydrous sodium sulfate, filtered, and concentrated to yield 280 mg of 6 (yield 60%). ESI-MS m/z:  $[M+H]^+$  calcd. 189.28; found 189.42.

**Table S1.** Primers and TRP2 template used for gene cloning

| <b>Primer</b>          | <b>Sequence</b>                                                                           |
|------------------------|-------------------------------------------------------------------------------------------|
| A109_pMRNA_<br>EcoRI_F | GAAGAAATATAAGAGAATTC                                                                      |
| A110_pMRNA_<br>BamHI_R | CCGCAGAAGGCAGCGGATCC                                                                      |
| Template               | Sequence <sup>α</sup>                                                                     |
| A267_TRP2              | GAAGAAATATAAGAGAATTCGCCACCATGAGCGTGTATGATTTTTTGT<br><u>GTGGCTGTAAGGATCCGCTGCCTTCTGCGG</u> |

<sup>α</sup> TRP2 coding sequence was underlined.

**Table S2.** Antibodies used for flow cytometry

| <b>Target</b> | <b>Label</b>         | <b>Provider</b> | <b>Catalog</b> |
|---------------|----------------------|-----------------|----------------|
| CD3e          | APC                  | eBioscience™    | 50-112-9569    |
| B220          | Brilliant Violet 650 | BD biosciences  | BDB563893      |
| NK-1.1        | APC-Cy7              | BD biosciences  | BDB560618      |
| CD11c         | PE-Cyanine7          | eBioscience     | 50-154-55      |
| F4/80         | PerCP-Cyanine5.5     | eBioscience     | 50-112-9034    |
| IFN- $\gamma$ | APC                  | Biolegend       | 50-169-921     |
| CD8a          | PE-Cy5               | BD biosciences  | BDB561094      |
| CD4           | APC-Cy7              | BD biosciences  | BDB561830      |
| CD3           | FITC                 | eBioscience     | 50-112-9706    |
| FoxP3         | APC                  | R&D system      | FPK8214A025    |
| CD45          | Brilliant Violet 510 | BD biosciences  | BDB563891      |
| MHC Class II  | PE                   | eBioscience     | 50-108-18      |
| CD11b         | APC/Cy7              | Biolegend       | 50-162-532     |
| CD163         | PE/Cyanine7          | Biolegend       | 155319         |
| CD86          | PE                   | BD biosciences  | BDB561129      |

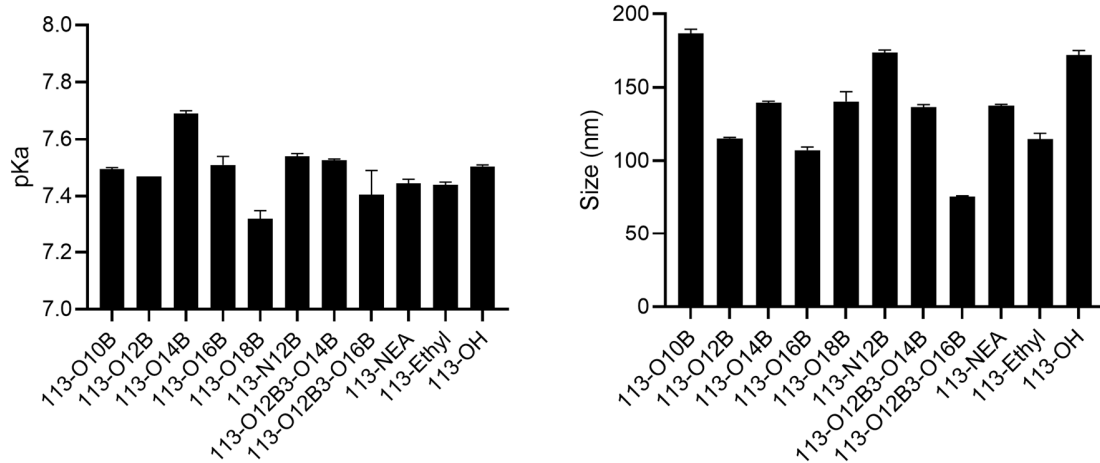

**Fig. S2.** pKa and size of different LNPs

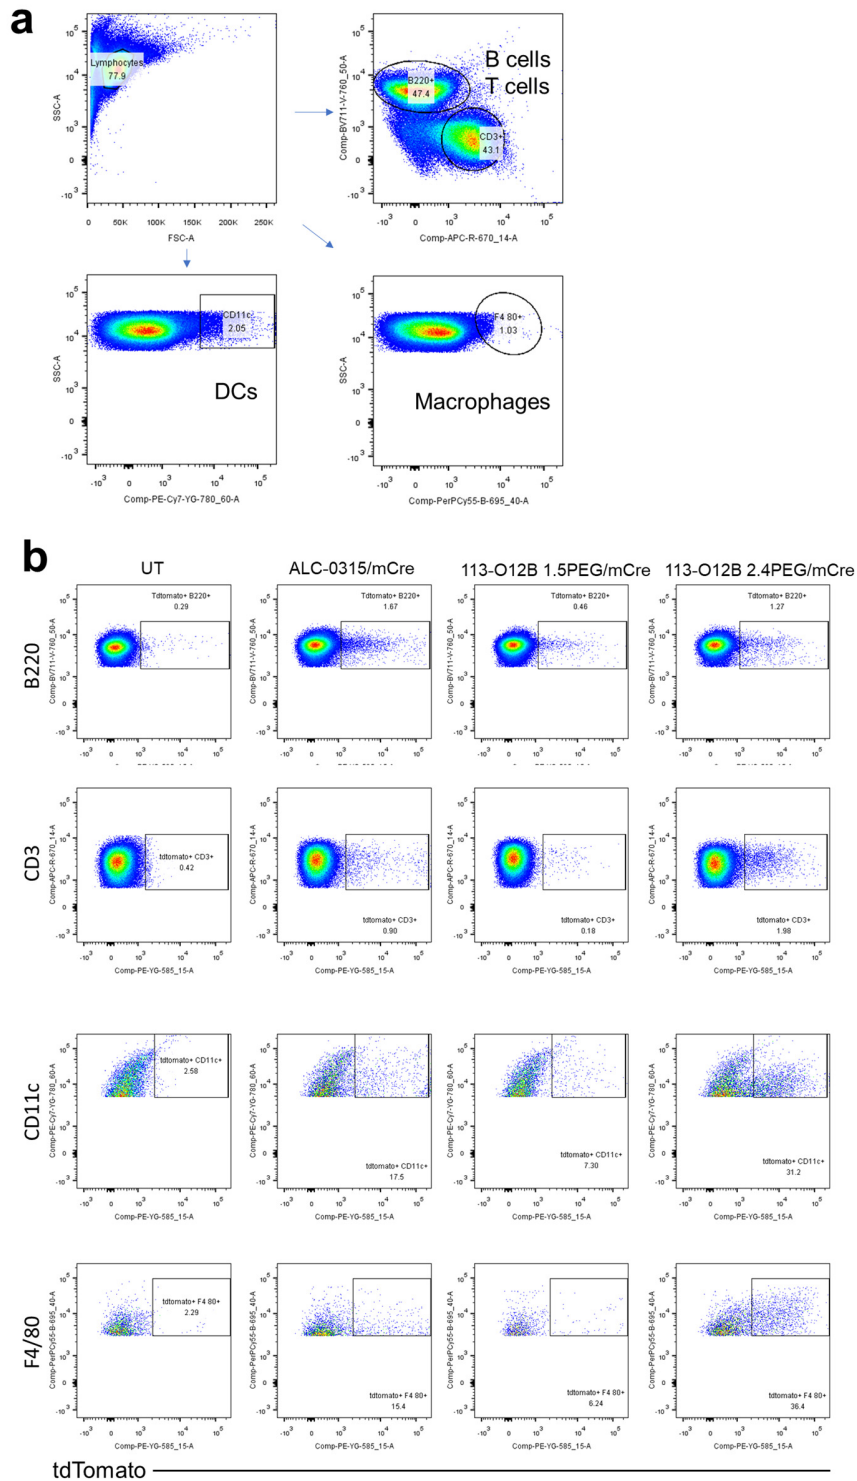

**Fig. S3.** Representative diagrams of flow cytometry for analysis of tdTomato positive cells with LNs after treatment with LNP/mCre



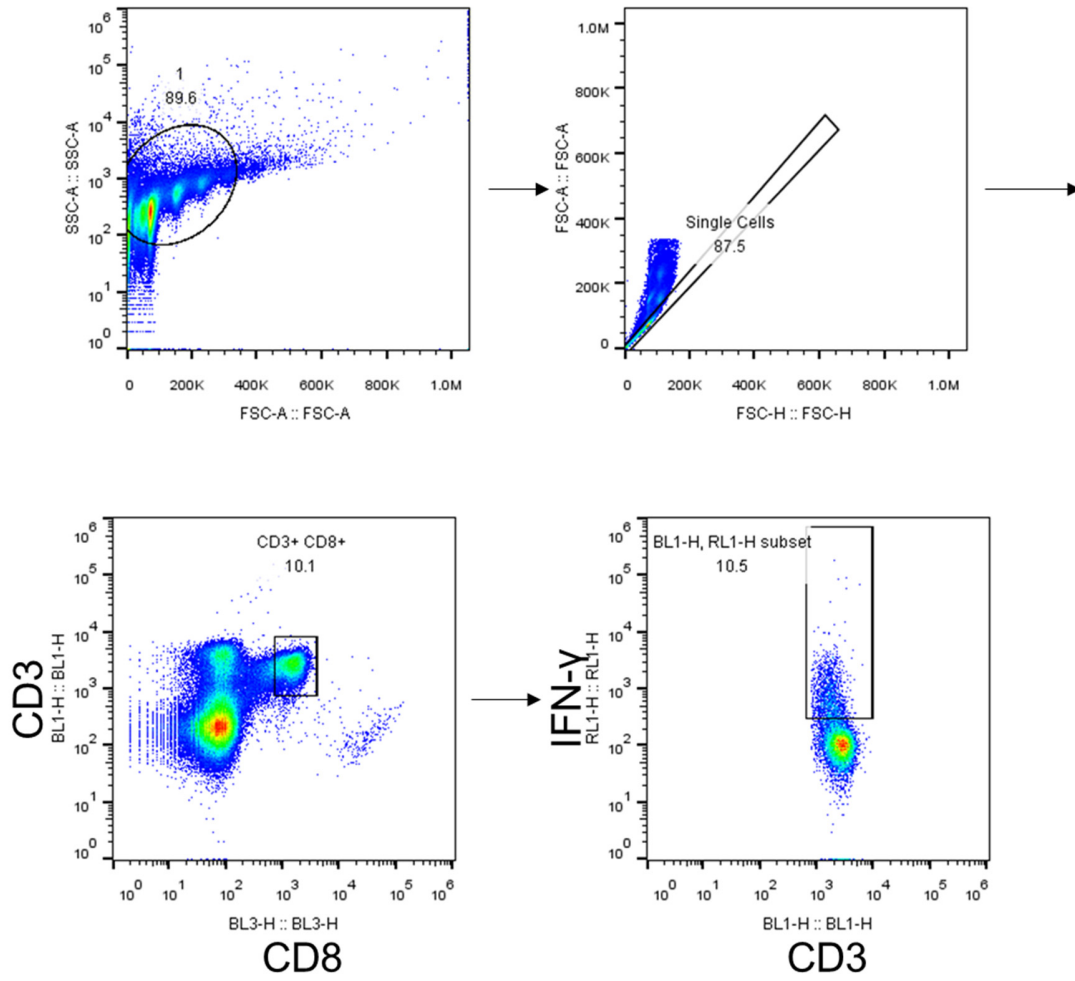

**Fig. S4.** Gating information for flow results of intracellular cytokine staining.

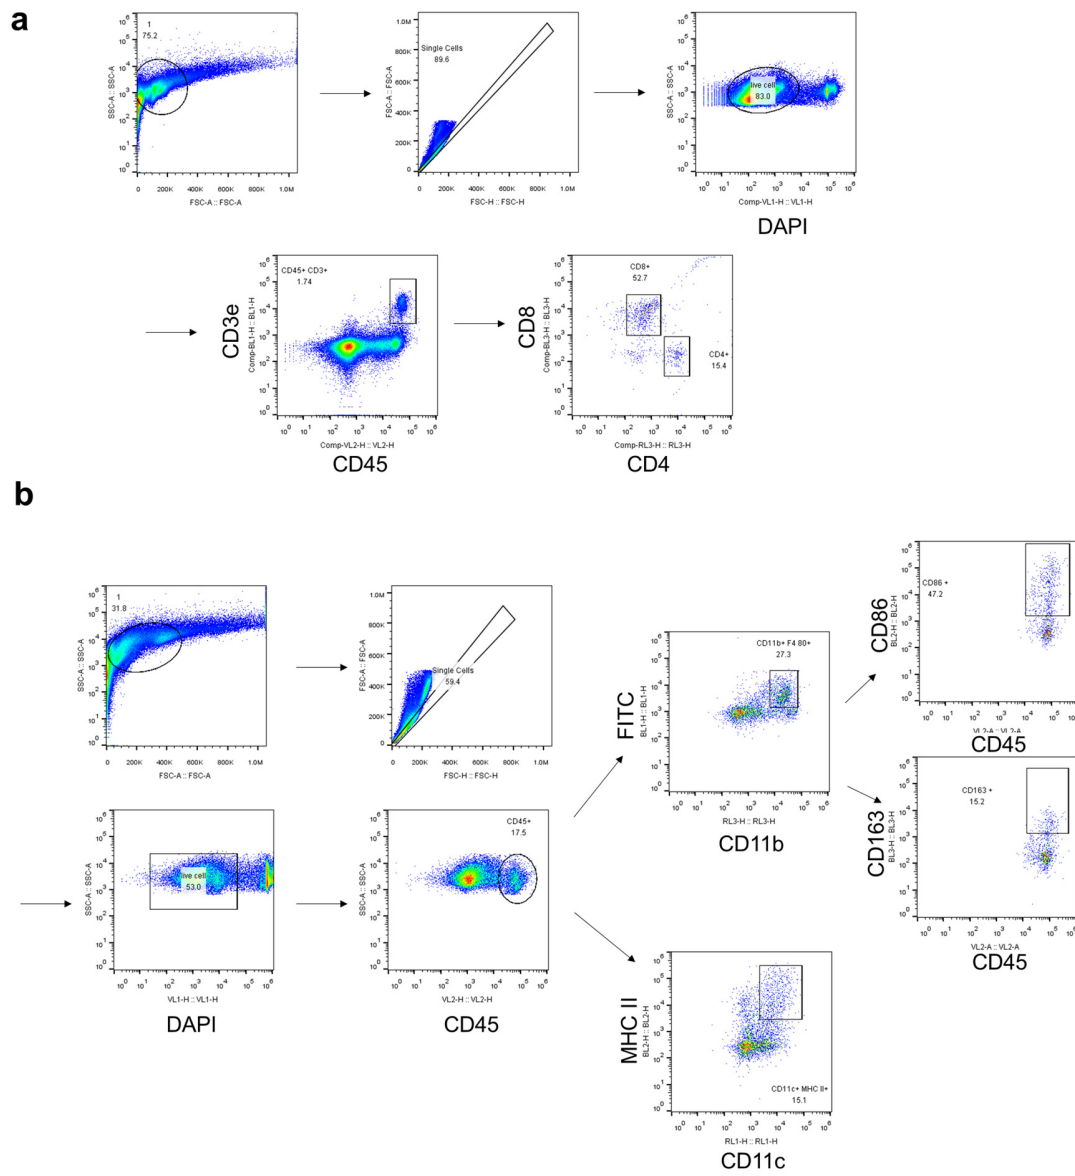

**Fig. S5.** Gating information for immunocellular composition experiment.

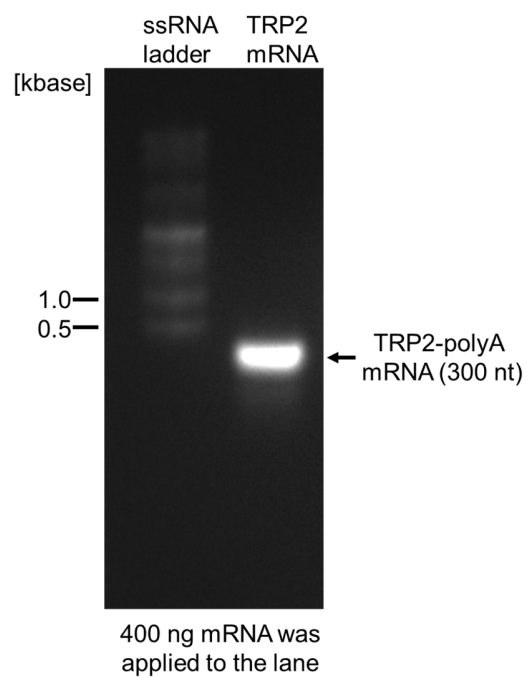

**Fig. S6.** Agarose gel electrophoresis of TRP2<sub>180-188</sub> mRNA.

#### Reference

1. Pittelkow, M.; Lewinsky, R.; Christensen, J.; *Synthesis*. 2002, 15, 2195-2202.
2. Scheffer U.; Strick, A.; Ludwig, V.; Peter, S.; kalden, E.; Göbel, M.; *J. Am. Chem. Soc.* 2005, 127, 2211-2217.
